# Supplementary material
Source: publisher figshare collection journal article supplement (https://plos.figshare.com/articles/dataset/_/149219)
Supplement: Supplementary file [file 1]

Table S7. Lion population pairwise  $F_{ST}$  estimates. Below the diagonal mtDNA data (12S-16S) and above the diagonal microsatellite data (22 loci).

| Populations |         |         |         |         |         |         |         |         |         |         |         |
|-------------|---------|---------|---------|---------|---------|---------|---------|---------|---------|---------|---------|
|             | GIR     | UGA     | KEN     | NGC     | SER-I   | SER-II  | SER-III | KRU     | BOT-I   | BOT-II  | NAM     |
| GIR         | —       | 0.59490 | 0.42296 | 0.51355 | 0.42389 | 0.45582 | 0.42903 | 0.53709 | 0.42459 | 0.39594 | 0.47708 |
| UGA         | 0.92157 | —       | 0.13685 | 0.22677 | 0.18111 | 0.23260 | 0.18323 | 0.24310 | 0.20616 | 0.17590 | 0.30731 |
| KEN         | 0.94667 | 1       | —       | 0.15719 | 0.08134 | 0.11455 | 0.09455 | 0.13799 | 0.13843 | 0.09341 | 0.20509 |
| NGC         | 0.92157 | —       | 1       | —       | 0.11771 | 0.15108 | 0.11405 | 0.26699 | 0.18085 | 0.14562 | 0.26318 |
| SER-I       | 0.91677 | 0.01852 | 0.99644 | 0.01852 | —       | 0.05463 | 0.04137 | 0.13276 | 0.13428 | 0.11136 | 0.22015 |
| SER-II      | 0.92157 | —       | 1       | —       | 0.01852 | —       | 0.06458 | 0.18868 | 0.13298 | 0.14046 | 0.25026 |
| SER-III     | 0.92157 | —       | 1       | —       | 0.01852 | —       | —       | 0.16163 | 0.12167 | 0.09745 | 0.20037 |
| KRU         | 0.74231 | 0.77174 | 0.84783 | 0.77174 | 0.76789 | 0.77174 | 0.77174 | —       | 0.14698 | 0.14598 | 0.20365 |
| BOT-I       | 0.92157 | —       | 1       | —       | 0.01852 | —       | —       | 0.77174 | —       | 0.09483 | 0.17988 |
| BOT-II      | 0.79987 | 0.84950 | 0.88485 | 0.84950 | 0.84608 | 0.84950 | 0.84950 | 0.52011 | 0.84950 | —       | 0.14103 |
| NAM         | 0.88021 | 0.93480 | 0.94588 | 0.93480 | 0.93141 | 0.93480 | 0.93480 | 0.62125 | 0.93480 | 0.06596 | —       |

Note - the mtDNA genetic distance among African populations can be higher than between African and Asian ones.
