# Supplementary material
Source: publisher figshare collection journal article supplement (https://plos.figshare.com/articles/dataset/_/149219)
Supplement: Supplementary file [file 1]

Table S2. Primers used to amplify the mtDNA (12S-16S) and nDNA (*ADA* and *TF*) portions surveyed in this study.

| Primer Name                        | Sequence                             |
|------------------------------------|--------------------------------------|
| <i>mtDNA (12S-16S)</i>             |                                      |
| O16S-CY-R                          | TTTTGGATCAATAAGTG                    |
| L12S-CY-F                          | CTTAAGTGACTAGCCCCTA                  |
| PAN-16S-CY-R                       | CAGAACTCAGATCACGTAG                  |
| 12S-UP-F                           | AAAAAGCTTCAAACCTGGGATTAGATACCCCACTAT |
| <i>ADA (exon 10 and intron 10)</i> |                                      |
| AA-ADA-ex10-F                      | GACCCGCTCATCTTCAAGTC                 |
| AA-ADA-ex11-R                      | CCCGTAGGCCTTATAGAGCA                 |
| <i>TF (intron 3)</i>               |                                      |
| AA-TF-ex3-F                        | GTGACGTTGGATGCAGGTTTGGTG             |
| AA-TF-ex4-R                        | CAATGGGGATGTTCCACCCAGC               |
