# Supplementary material
Source: publisher figshare collection journal article supplement (https://plos.figshare.com/articles/dataset/_/149219)
Supplement: Supplementary file [file 1]

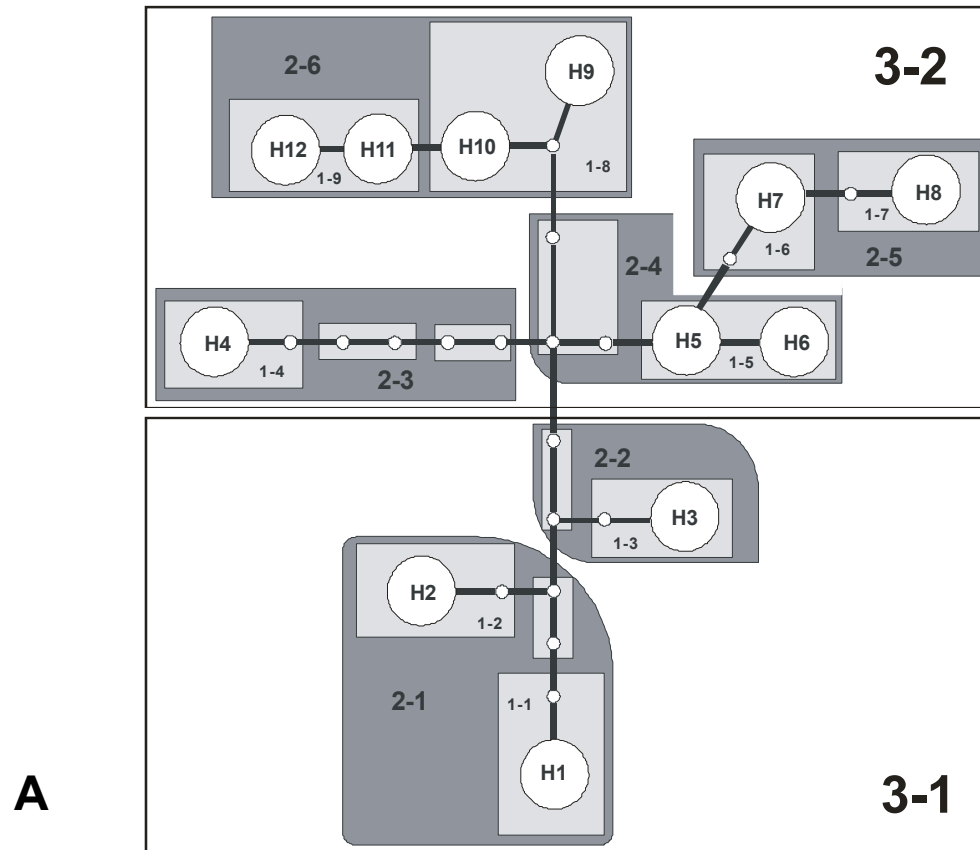

**Figure S5.** Nested design and summary results of the nested clade phylogeographic analysis (NCPA) for lion mtDNA data. **(A)** Nested design of the mtDNA haplotype network used for the NCPA. **(B)** Summary results of the NCPA. RGF/IBD - Restricted gene flow/isolation by distance. LDC/FR – long distance colonization/fragmentation.
