# Supplementary material
Source: publisher figshare collection journal article supplement (https://plos.figshare.com/articles/dataset/_/149219)
Supplement: Supplementary file [file 1]

Table S8. Taxon specific unique nDNA alleles in lion populations (FCA-microsatellites and ADA locus).

| Taxon   | Locus      | allele    |
|---------|------------|-----------|
| GIR     | FCA211     | 142       |
| GIR     | FCA14      | 154       |
| GIR     | FCA230     | 82        |
| UGA     | FCA8       | 137       |
| UGA     | FCA98      | 90        |
| UGA     | FCA230     | 98        |
| KEN     | FCA105     | 219       |
| KEN     | FCA281     | 261       |
| KEN     | FCA69      | 85        |
| KEN     | FCA14      | 166       |
| KEN     | FCA85      | 129       |
| SER-I   | FCA6       | 189       |
| SER-I   | FCA98      | 116       |
| SER-II  | FCA6       | 197       |
| SER-II  | <b>ADA</b> | <b>A3</b> |
| SER-II  | FCA208     | 303       |
| SER-II  | FCA230     | 74        |
| SER-II  | FCA205     | 106       |
| SER-III | FCA69      | 95        |
| SER-III | FCA208     | 323       |
| SER-III | FCA208     | 325       |
| SER-III | FCA247     | 163       |
| KRU     | FCA211     | 154       |
| KRU     | FCA98      | 122       |
| KRU     | FCA247     | 161       |
| KRU     | FCA205     | 118       |
| BOT-I   | FCA281     | 236       |
| BOT-I   | FCA281     | 266       |
| BOT-I   | FCA281     | 268       |
| BOT-I   | FCA91      | 164       |
| BOT-I   | FCA208     | 299       |
| BOT-II  | FCA8       | 119       |
| BOT-II  | FCA77      | 183       |
| BOT-II  | FCA91      | 162       |
| BOT-II  | FCA98      | 104       |
| BOT-II  | FCA129     | 183       |
| NAM     | FCA6       | 213       |
| NAM     | FCA98      | 118       |
| NAM     | FCA230     | 76        |
| NAM     | FCA205     | 112       |

Note-1: individual ATL lions showed two unique alleles (FCA8\*135 and FCA8\*145)

Note-2: individual ZBW lion showed one unique alleles (FCA126\*175)
