# Supplementary material
Source: publisher figshare collection journal article supplement (https://plos.figshare.com/articles/dataset/_/149219)
Supplement: Supplementary file [file 1]

Table S3. Structure cluster assignment results of 357 lions based on nDNA (*ADA*, *TF*, and 22 microsatellites) and mtDNA markers. Burn-in and replication values set at 30,000 and 1,000,000, respectively.

| K  | Ln       | Var[LnP(D)] | alpha  | Pr(K) |
|----|----------|-------------|--------|-------|
| 1  | -17517.8 | 105.9       | -      | 0     |
| 2  | -16378.0 | 335.9       | 0.0862 | 0     |
| 3  | -15690.2 | 422.4       | 0.0425 | 0     |
| 4  | -15197.2 | 526.5       | 0.0392 | 0     |
| 5  | -14872.4 | 550.6       | 0.0315 | 0     |
| 6  | -14719.1 | 678.6       | 0.0325 | 0     |
| 7  | -14555.4 | 811.5       | 0.0338 | ~0    |
| 8  | -14297.3 | 902.2       | 0.0325 | ~0    |
| 9  | -14430.1 | 1368.2      | 0.0325 | ~0    |
| 10 | -14171.6 | 1116.0      | 0.0318 | ~0    |
| 12 | -14762.5 | 2916.6      | 0.0329 | 0     |
| 13 | -14373.8 | 2335.9      | 0.0330 | ~0    |
| 14 | -14016.4 | 1820.1      | 0.0332 | ~0    |
