# Supplementary material
Source: publisher figshare collection journal article supplement (https://plos.figshare.com/articles/dataset/_/149219)
Supplement: Supplementary file [file 1]

## 12S-16S

| Lineage | Haplotype | 2345556667 | 7888999001 | 111 1111111 |
|---------|-----------|------------|------------|-------------|
|         | H1        | CCTCGGTTGC | TGTAAAACCA | ATATCCC     |
| II      | H2        | ....A..... | ..C.-A.... | .C...T.     |
|         | H3        | ...TA..... | ....-AG... | G....T.     |
| I       | H4        | ..C.A...AT | C...--G.T. | ....TTT     |
|         | H5        | .T..A.C... | ....--G... | ....TT      |
| III     | H6        | .T..A.C... | .A.--G...  | ....TT      |
|         | H7        | TT..A..C.. | ....--G..G | ....TT      |
|         | H8        | TT..A.C... | ....--G..G | ....TT      |
| IV      | H9        | ....A..C.. | ...G--G... | ..G..TT     |
|         | H10       | ....A..C.. | ....--G... | ..GC.TT     |
|         | H11       | ....A..C.. | ....--GT.. | ..GC.TT     |
|         | H12       | ....AA.C.. | ....--GT.. | ..GC.TT     |

**A**

## ADA

| Haplotype | 11133 | 33 |
|-----------|-------|----|
|           | 00300 | 23 |
|           | 67918 | 17 |
| A1        | GGCCC | GG |
| A2        | ..... | A. |
| A3        | ..... | AT |
| A4        | ..G.T | A. |
| A5        | --.T. | A. |

**B**

## TF

| Haplotype | 11  |
|-----------|-----|
|           | 225 |
|           | 083 |
| T1        | ACT |
| T2        | T.A |
| T3        | TTA |

**C**

**Figure S1.** Genetic variation of *12S-16S* (mtDNA) and *ADA* and *TF* (nDNA) genes in lions. (A) Haplotypes and variable sites for the *12S-16S* mtDNA region surveyed in lions (total length 1,882 bp). Position 1 corresponds to position 1441 of the domestic cat (*Felis catus*) mtDNA genome (GenBank U20753). The "-" represents a gap and "." matches the nucleotide in the first sequence. Shading indicates a fixed difference in the mtDNA lineage. (B) Haplotypes and variable sites for the *ADA* gene segment surveyed in lions (total length 427 bp). (C) Haplotypes and variable sites for the *TF* gene segment surveyed in lions (total length 427 bp).
