# Supplementary material
Source: publisher figshare collection journal article supplement (https://plos.figshare.com/articles/dataset/_/149219)
Supplement: Supplementary file [file 1]

Table S9. Summary statistics for FIV<sub>Ple</sub> data.

|          |          | FIV statistics within lion populations |       |       |       |        |         |       |        | FIV-Ple subtypes statistics |       |       |       |       |       |
|----------|----------|----------------------------------------|-------|-------|-------|--------|---------|-------|--------|-----------------------------|-------|-------|-------|-------|-------|
|          |          | UGA                                    | KEN   | NGC   | SER-I | SER-II | SER-III | KRU   | BOT-II | A                           | B     | C     | D     | E     | F     |
|          | <i>N</i> | 2                                      | 6     | 14    | 27    | 14     | 15      | 11    | 21     | 9                           | 43    | 18    | 8     | 19    | 4     |
| <i>h</i> |          | 1                                      | 0.867 | 0.989 | 0.972 | 0.956  | 1       | 0.964 | 0.967  | 1                           | 0.997 | 0.817 | 0.929 | 0.971 | 0.833 |
| $\pi$    |          | 0.003                                  | 0.055 | 0.069 | 0.132 | 0.149  | 0.134   | 0.101 | 0.103  | 0.090                       | 0.091 | 0.036 | 0.066 | 0.082 | 0.007 |
| <i>S</i> |          | 1                                      | 37    | 43    | 102   | 77     | 104     | 73    | 79     | 48                          | 78    | 33    | 44    | 63    | 4     |

*h* - haplotype diversity

$\pi$  - nucleotide diversity

*S* - segregating sites
