# Supplementary material
Source: publisher figshare collection journal article supplement (https://plos.figshare.com/articles/dataset/_/149219)
Supplement: Supplementary file [file 1]

Table S4. Gene diversity and frequency values in lion populations.

| Population | <i>Haplotype data</i> |         |             |         |           |         | <i>Frequency data</i>  |       |          |          |                                   |       |       |          |          |
|------------|-----------------------|---------|-------------|---------|-----------|---------|------------------------|-------|----------|----------|-----------------------------------|-------|-------|----------|----------|
|            | <i>mtDNA</i>          |         | <i>nDNA</i> |         |           |         | <i>nDNA</i>            |       |          |          |                                   |       |       |          |          |
|            | <i>12S and 16S</i>    |         | <i>ADA</i>  |         | <i>TF</i> |         | <i>microsatellites</i> |       |          |          | <i>ADA + TF + microsatellites</i> |       |       |          |          |
|            | <i>h</i>              | $\pi$   | <i>h</i>    | $\pi$   | <i>h</i>  | $\pi$   | $H_E$                  | $H_O$ | $P_{95}$ | <i>A</i> | $A_U$                             | $H_E$ | $H_O$ | $P_{95}$ | <i>A</i> |
| GIR        | 0.53                  | 0.00057 | –           | –       | –         | –       | 0.106                  | 0.122 | 0.32     | 1.4      | 3                                 | 0.097 | 0.112 | 0.29     | 1.4      |
| UGA        | –                     | –       | –           | –       | 0.30      | 0.00359 | 0.471                  | 0.621 | 0.86     | 2.8      | 3                                 | 0.442 | 0.582 | 0.83     | 2.7      |
| KEN        | –                     | –       | 0.66        | 0.00268 | 0.67      | 0.00742 | 0.692                  | 0.684 | 1        | 5.1      | 5                                 | 0.688 | 0.679 | 1        | 5.0      |
| SER-I      | 0.03                  | 0.00001 | 0.45        | 0.00208 | 0.51      | 0.00616 | 0.643                  | 0.637 | 1        | 6.0      | 2                                 | 0.628 | 0.623 | 1        | 5.7      |
| SER-II     | –                     | –       | 0.40        | 0.00165 | 0.56      | 0.00620 | 0.596                  | 0.653 | 1        | 5.1      | 5                                 | 0.586 | 0.637 | 1        | 5.0      |
| SER-III    | –                     | –       | 0.28        | 0.00113 | 0.52      | 0.00586 | 0.640                  | 0.667 | 1        | 5.7      | 4                                 | 0.620 | 0.641 | 1        | 5.5      |
| NGC        | –                     | –       | 0.28        | 0.00120 | 0.48      | 0.00569 | 0.586                  | 0.613 | 1        | 4.2      | 0                                 | 0.569 | 0.588 | 1        | 4.0      |
| KRU        | 0.41                  | 0.00151 | 0.23        | 0.00107 | 0.32      | 0.00382 | 0.574                  | 0.649 | 0.95     | 4.2      | 4                                 | 0.546 | 0.619 | 0.96     | 4.0      |
| BOT-I      | –                     | –       | 0.24        | 0.00110 | 0.49      | 0.00584 | 0.628                  | 0.602 | 1        | 4.8      | 5                                 | 0.606 | 0.586 | 1        | 4.6      |
| BOT-II     | 0.29                  | 0.00109 | 0.08        | 0.00038 | 0.62      | 0.00737 | 0.699                  | 0.736 | 1        | 5.7      | 5                                 | 0.668 | 0.704 | 0.96     | 5.4      |
| NAM        | 0.21                  | 0.00056 | 0.51        | 0.00238 | 0.50      | 0.00582 | 0.572                  | 0.577 | 1        | 4.4      | 4                                 | 0.565 | 0.570 | 1        | 4.2      |

*h* - haplotype diversity

$\pi$  - nucleotide diversity

$H_E$  - expected heterozygosity

$H_O$  - observed heterozygosity

$P_{95}$  - percentage of polymorphic loci at 5%

*A* - mean number of alleles

$A_U$  - number of unique alleles
