# Supplementary material
Source: publisher figshare collection journal article supplement (https://plos.figshare.com/articles/dataset/_/149219)
Supplement: Supplementary file [file 1]

Table S6. Results of the hierarchical AMOVA in lions for four different geographical scenarios.

|                                | 3-group scenario <sup>a</sup> |                   | 4-group scenario <sup>b</sup> |                   | 5-group scenario <sup>c</sup> |                   | 6-group scenario <sup>d</sup> |                   |
|--------------------------------|-------------------------------|-------------------|-------------------------------|-------------------|-------------------------------|-------------------|-------------------------------|-------------------|
|                                | $\Phi$ statistics             | % total variation | $\Phi$ statistics             | % total variation | $\Phi$ statistics             | % total variation | $\Phi$ statistics             | % total variation |
| within-population              | $\Phi_{ST} = 0.916^{***}$     | 8.43              | $\Phi_{ST} = 0.916^{***}$     | 8.38              | $\Phi_{ST} = 0.916^{***}$     | 8.44              | $\Phi_{ST} = 0.916^{***}$     | 8.40              |
| among-population within-groups | $\Phi_{SC} = 0.729^{***}$     | 22.67             | $\Phi_{SC} = 0.476^{***}$     | 7.62              | $\Phi_{SC} = 0.192^{**}$      | 2.00              | $\Phi_{SC} = 0.032^{NS}$      | 0.28              |
| among-groups                   | $\Phi_{CT} = 0.689^*$         | 68.91             | $\Phi_{CT} = 0.840^{***}$     | 84.00             | $\Phi_{CT} = 0.896^{***}$     | 89.55             | $\Phi_{CT} = 0.913^{***}$     | 91.32             |

<sup>a</sup> 3-group scenario = [(ANG+ATL+GIR), (UGA+KEN+SER+NGC+BOT-I), (NAM,BOT-II, KRU)]

<sup>b</sup> 4-group scenario = [(ANG+ATL+GIR), (UGA+SER+NGC+BOT-I), (KEN), (NAM,BOT-II, KRU)]

<sup>c</sup> 5-group scenario = [(ANG+ATL+GIR), (UGA+SER+NGC+BOT-I), (KEN), (NAM,BOT-II), (KRU)]

<sup>d</sup> 6-group scenario = [(ANG+ATL), (GIR), (UGA+SER+NGC+BOT-I), (KEN), (NAM,BOT-II), (KRU)]

NS - not significant; \*  $P < 0.05$ ; \*\*  $P < 0.001$ ; \*\*\*  $P < 0.0001$ .
