# Supplementary material
Source: publisher figshare collection journal article supplement (https://plos.figshare.com/articles/dataset/_/149219)
Supplement: Supplementary file [file 1]

Table S1. List of the lion samples used in this study.

| Code Name | sex     | Status  | Country  | Code Name | sex     | Status  | Country      | Code Name | sex     | Status | Country  |
|-----------|---------|---------|----------|-----------|---------|---------|--------------|-----------|---------|--------|----------|
| PLE-ANG01 | F       | captive | ANGOLA   | PLE-0442  | M       | wild    | NAMIBIA      | PLE-0350  | M       | wild   | TANZANIA |
| PLE-ANG02 | M       | captive | ANGOLA   | PLE-0443  | M       | wild    | NAMIBIA      | PLE-0356  | F       | wild   | TANZANIA |
| PLE-0683  | M       | wild    | BOTSWANA | PLE-0448  | F       | wild    | NAMIBIA      | PLE-0357  | F       | wild   | TANZANIA |
| PLE-0685  | F       | wild    | BOTSWANA | PLE-0984  | M       | wild    | NAMIBIA      | PLE-0358  | F       | wild   | TANZANIA |
| PLE-0686  | F       | wild    | BOTSWANA | PLE-0986  | F       | wild    | NAMIBIA      | PLE-0360  | F       | wild   | TANZANIA |
| PLE-0687  | M       | wild    | BOTSWANA | PLE-0989  | M       | wild    | NAMIBIA      | PLE-0361  | F       | wild   | TANZANIA |
| PLE-0690  | M       | wild    | BOTSWANA | PLE-0992  | F       | wild    | NAMIBIA      | PLE-0364  | M       | wild   | TANZANIA |
| PLE-0691  | F       | wild    | BOTSWANA | PLE-0993  | M       | wild    | NAMIBIA      | PLE-0365  | M       | wild   | TANZANIA |
| PLE-0692  | M       | wild    | BOTSWANA | PLE-0994  | M       | wild    | NAMIBIA      | PLE-0372  | F       | wild   | TANZANIA |
| PLE-0693  | F       | wild    | BOTSWANA | PLE-0995  | F       | wild    | NAMIBIA      | PLE-0377  | F       | wild   | TANZANIA |
| PLE-0694  | F       | wild    | BOTSWANA | PLE-0996  | M       | wild    | NAMIBIA      | PLE-0382  | M       | wild   | TANZANIA |
| PLE-0695  | F       | wild    | BOTSWANA | PLE-0999  | F       | wild    | NAMIBIA      | PLE-0384  | M       | wild   | TANZANIA |
| PLE-0696  | F       | wild    | BOTSWANA | PLE-1002  | M       | wild    | NAMIBIA      | PLE-0388  | F       | wild   | TANZANIA |
| PLE-0697  | F       | wild    | BOTSWANA | PLE-1003  | M       | wild    | NAMIBIA      | PLE-0389  | F       | wild   | TANZANIA |
| PLE-0698  | F       | wild    | BOTSWANA | PLE-1006  | M       | wild    | NAMIBIA      | PLE-0390  | F       | wild   | TANZANIA |
| PLE-0699  | F       | wild    | BOTSWANA | PLE-1007  | F       | wild    | NAMIBIA      | PLE-0391  | F       | wild   | TANZANIA |
| PLE-0700  | F       | wild    | BOTSWANA | PLE-1009  | F       | wild    | NAMIBIA      | PLE-0392  | F       | wild   | TANZANIA |
| PLE-0855  | F       | wild    | BOTSWANA | PLE-1010  | M       | wild    | NAMIBIA      | PLE-0458  | F       | wild   | TANZANIA |
| PLE-0856  | F       | wild    | BOTSWANA | PLE-1011  | F       | wild    | NAMIBIA      | PLE-0465  | F       | wild   | TANZANIA |
| PLE-0857  | F       | wild    | BOTSWANA | PLE-0035  | M       | captive | SOUTH AFRICA | PLE-0466  | F       | wild   | TANZANIA |
| PLE-0859  | M       | wild    | BOTSWANA | PLE-0036  | F       | captive | SOUTH AFRICA | PLE-0467  | F       | wild   | TANZANIA |
| PLE-0860  | F       | wild    | BOTSWANA | PLE-0150  | M       | wild    | SOUTH AFRICA | PLE-0468  | F       | wild   | TANZANIA |
| PLE-0861  | F       | wild    | BOTSWANA | PLE-0153  | M       | wild    | SOUTH AFRICA | PLE-0469  | F       | wild   | TANZANIA |
| PLE-0862  | F       | wild    | BOTSWANA | PLE-0155  | M       | wild    | SOUTH AFRICA | PLE-0471  | F       | wild   | TANZANIA |
| PLE-0863  | F       | wild    | BOTSWANA | PLE-0157  | F       | wild    | SOUTH AFRICA | PLE-0472  | F       | wild   | TANZANIA |
| PLE-0869  | Unknown | wild    | BOTSWANA | PLE-0161  | F       | wild    | SOUTH AFRICA | PLE-0473  | M       | wild   | TANZANIA |
| PLE-0870  | Unknown | wild    | BOTSWANA | PLE-0162  | F       | wild    | SOUTH AFRICA | PLE-0474  | F       | wild   | TANZANIA |
| PLE-0872  | F       | wild    | BOTSWANA | PLE-0163  | M       | wild    | SOUTH AFRICA | PLE-0476  | M       | wild   | TANZANIA |
| PLE-0873  | M       | wild    | BOTSWANA | PLE-0167  | F       | wild    | SOUTH AFRICA | PLE-0481  | M       | wild   | TANZANIA |
| PLE-0875  | M       | wild    | BOTSWANA | PLE-0168  | M       | captive | SOUTH AFRICA | PLE-0482  | M       | wild   | TANZANIA |
| PLE-0876  | F       | wild    | BOTSWANA | PLE-0171  | Unknown | wild    | SOUTH AFRICA | PLE-0483  | F       | wild   | TANZANIA |
| PLE-0877  | M       | wild    | BOTSWANA | PLE-0172  | M       | wild    | SOUTH AFRICA | PLE-0484  | F       | wild   | TANZANIA |
| PLE-0880  | F       | wild    | BOTSWANA | PLE-0173  | M       | wild    | SOUTH AFRICA | PLE-0485  | F       | wild   | TANZANIA |
| PLE-0881  | F       | wild    | BOTSWANA | PLE-0175  | M       | wild    | SOUTH AFRICA | PLE-0486  | F       | wild   | TANZANIA |
| PLE-0882  |         | wild    | BOTSWANA | PLE-0176  | F       | wild    | SOUTH AFRICA | PLE-0487  | F       | wild   | TANZANIA |
| PLE-0883  | F       | wild    | BOTSWANA | PLE-0177  | F       | wild    | SOUTH AFRICA | PLE-0489  | F       | wild   | TANZANIA |
| PLE-0884  | M       | wild    | BOTSWANA | PLE-0179  | M       | wild    | SOUTH AFRICA | PLE-0490  | F       | wild   | TANZANIA |
| PLE-0885  | M       | wild    | BOTSWANA | PLE-0180  | M       | wild    | SOUTH AFRICA | PLE-0494  | M       | wild   | TANZANIA |
| PLE-0889  | M       | wild    | BOTSWANA | PLE-0181  | Unknown | wild    | SOUTH AFRICA | PLE-0502  | M       | wild   | TANZANIA |
| PLE-0893  | Unknown | wild    | BOTSWANA | PLE-0701  | M       | wild    | SOUTH AFRICA | PLE-0503  | F       | wild   | TANZANIA |
| PLE-0894  | Unknown | wild    | BOTSWANA | PLE-0702  | M       | wild    | SOUTH AFRICA | PLE-0504  | M       | wild   | TANZANIA |
| PLE-0895  | Unknown | wild    | BOTSWANA | PLE-0703  | M       | wild    | SOUTH AFRICA | PLE-0505  | M       | wild   | TANZANIA |
| PLE-0896  | F       | wild    | BOTSWANA | PLE-0704  | F       | wild    | SOUTH AFRICA | PLE-0507  | M       | wild   | TANZANIA |
| PLE-0897  | F       | wild    | BOTSWANA | PLE-0705  | F       | wild    | SOUTH AFRICA | PLE-0508  | M       | wild   | TANZANIA |
| PLE-0898  | Unknown | wild    | BOTSWANA | PLE-0706  | F       | wild    | SOUTH AFRICA | PLE-0511  | F       | wild   | TANZANIA |
| PLE-0899  | Unknown | wild    | BOTSWANA | PLE-0707  | M       | wild    | SOUTH AFRICA | PLE-0512  | F       | wild   | TANZANIA |
| PLE-0900  | Unknown | wild    | BOTSWANA | PLE-0708  | M       | wild    | SOUTH AFRICA | PLE-0513  | F       | wild   | TANZANIA |
| PLE-0902  | M       | wild    | BOTSWANA | PLE-0709  | M       | wild    | SOUTH AFRICA | PLE-0515  | M       | wild   | TANZANIA |
| PLE-0903  | Unknown | wild    | BOTSWANA | PLE-0710  | F       | wild    | SOUTH AFRICA | PLE-0517  | M       | wild   | TANZANIA |
| PLE-0905  | Unknown | wild    | BOTSWANA | PLE-0711  | F       | wild    | SOUTH AFRICA | PLE-0518  | M       | wild   | TANZANIA |
| PLE-0971  | F       | wild    | BOTSWANA | PLE-0712  | M       | wild    | SOUTH AFRICA | PLE-0526  | F       | wild   | TANZANIA |
| PLE-0975  | M       | wild    | BOTSWANA | PLE-0713  | F       | wild    | SOUTH AFRICA | PLE-0528  | M       | wild   | TANZANIA |
| PLE-1025  | F       | wild    | BOTSWANA | PLE-0714  | F       | wild    | SOUTH AFRICA | PLE-0529  | M       | wild   | TANZANIA |
| PLE-1026  | M       | wild    | BOTSWANA | PLE-0715  | M       | wild    | SOUTH AFRICA | PLE-0532  | F       | wild   | TANZANIA |
| PLE-1027  | M       | wild    | BOTSWANA | PLE-0716  | F       | wild    | SOUTH AFRICA | PLE-0534  | M       | wild   | TANZANIA |
| PLE-1028  | F       | wild    | BOTSWANA | PLE-0717  | M       | wild    | SOUTH AFRICA | PLE-0547  | Unknown | wild   | TANZANIA |
| PLE-1029  | F       | wild    | BOTSWANA | PLE-0718  | M       | wild    | SOUTH AFRICA | PLE-0554  | M       | wild   | TANZANIA |
| PLE-1030  | F       | wild    | BOTSWANA | PLE-0720  | F       | wild    | SOUTH AFRICA | PLE-0567  | F       | wild   | TANZANIA |
| PLE-1031  | F       | wild    | BOTSWANA | PLE-0721  | M       | wild    | SOUTH AFRICA | PLE-0570  | F       | wild   | TANZANIA |

Table S1. Continued

| Code Name | sex | Status  | Country  | Code Name | sex | Status  | Country      | Code Name | sex | Status  | Country  |
|-----------|-----|---------|----------|-----------|-----|---------|--------------|-----------|-----|---------|----------|
| PLE-1032  | F   | wild    | BOTSWANA | PLE-0722  | M   | wild    | SOUTH AFRICA | PLE-0579  | F   | wild    | TANZANIA |
| PLE-1034  | F   | wild    | BOTSWANA | PLE-0723  | F   | wild    | SOUTH AFRICA | PLE-0584  | M   | wild    | TANZANIA |
| PLE-1035  | M   | wild    | BOTSWANA | PLE-0724  | M   | wild    | SOUTH AFRICA | PLE-0585  | M   | wild    | TANZANIA |
| PLE-1036  | M   | wild    | BOTSWANA | PLE-1045  | F   | captive | SOUTH AFRICA | PLE-0586  | F   | wild    | TANZANIA |
| PLE-1037  | F   | wild    | BOTSWANA | PLE-0227  | M   | wild    | TANZANIA     | PLE-0587  | M   | wild    | TANZANIA |
| PLE-1039  | F   | wild    | BOTSWANA | PLE-0228  | M   | wild    | TANZANIA     | PLE-0588  | M   | wild    | TANZANIA |
| PLE-1725  | F   | wild    | BOTSWANA | PLE-0229  | M   | wild    | TANZANIA     | PLE-0590  | F   | wild    | TANZANIA |
| PLE-1726  | F   | wild    | BOTSWANA | PLE-0230  | M   | wild    | TANZANIA     | PLE-0591  | M   | wild    | TANZANIA |
| PLE-1728  | M   | wild    | BOTSWANA | PLE-0242  | F   | wild    | TANZANIA     | PLE-0592  | M   | wild    | TANZANIA |
| PLE-1729  | F   | wild    | BOTSWANA | PLE-0243  | F   | wild    | TANZANIA     | PLE-0593  | F   | wild    | TANZANIA |
| PLE-1731  | M   | wild    | BOTSWANA | PLE-0246  | F   | wild    | TANZANIA     | PLE-0598  | F   | wild    | TANZANIA |
| PLE-1734  | F   | wild    | BOTSWANA | PLE-0247  | F   | wild    | TANZANIA     | PLE-0599  | F   | wild    | TANZANIA |
| PLE-0050  | F   | captive | INDIA    | PLE-0248  | F   | wild    | TANZANIA     | PLE-0600  | M   | wild    | TANZANIA |
| PLE-0053  | F   | captive | INDIA    | PLE-0249  | F   | wild    | TANZANIA     | PLE-0601  | F   | wild    | TANZANIA |
| PLE-0058  | F   | captive | INDIA    | PLE-0250  | F   | wild    | TANZANIA     | PLE-0606  | F   | wild    | TANZANIA |
| PLE-0060  | M   | captive | INDIA    | PLE-0251  | F   | wild    | TANZANIA     | PLE-0608  | F   | wild    | TANZANIA |
| PLE-0067  | F   | captive | INDIA    | PLE-0252  | F   | wild    | TANZANIA     | PLE-0609  | F   | wild    | TANZANIA |
| PLE-0068  | F   | captive | INDIA    | PLE-0253  | M   | wild    | TANZANIA     | PLE-0612  | M   | wild    | TANZANIA |
| PLE-0069  | F   | captive | INDIA    | PLE-0254  | F   | wild    | TANZANIA     | PLE-0613  | M   | wild    | TANZANIA |
| PLE-0070  | F   | captive | INDIA    | PLE-0255  | F   | wild    | TANZANIA     | PLE-0614  | F   | wild    | TANZANIA |
| PLE-0071  | M   | captive | INDIA    | PLE-0257  | F   | wild    | TANZANIA     | PLE-0616  | F   | wild    | TANZANIA |
| PLE-0202  | M   | captive | INDIA    | PLE-0258  | M   | wild    | TANZANIA     | PLE-0617  | M   | wild    | TANZANIA |
| PLE-0205  | F   | captive | INDIA    | PLE-0259  | F   | wild    | TANZANIA     | PLE-0619  | M   | wild    | TANZANIA |
| PLE-0725  | M   | wild    | KENYA    | PLE-0261  | M   | wild    | TANZANIA     | PLE-0621  | F   | wild    | TANZANIA |
| PLE-0734  | F   | wild    | KENYA    | PLE-0262  | F   | wild    | TANZANIA     | PLE-0622  | F   | wild    | TANZANIA |
| PLE-0735  | M   | wild    | KENYA    | PLE-0265  | F   | wild    | TANZANIA     | PLE-0624  | M   | wild    | TANZANIA |
| PLE-0736  | M   | wild    | KENYA    | PLE-0266  | F   | wild    | TANZANIA     | PLE-0626  | F   | wild    | TANZANIA |
| PLE-0741  | M   | wild    | KENYA    | PLE-0267  | F   | wild    | TANZANIA     | PLE-0628  | F   | wild    | TANZANIA |
| PLE-0742  | F   | wild    | KENYA    | PLE-0270  | F   | wild    | TANZANIA     | PLE-0630  | F   | wild    | TANZANIA |
| PLE-0743  | M   | wild    | KENYA    | PLE-0271  | F   | wild    | TANZANIA     | PLE-0633  | F   | wild    | TANZANIA |
| PLE-0744  | F   | wild    | KENYA    | PLE-0272  | F   | wild    | TANZANIA     | PLE-0634  | F   | wild    | TANZANIA |
| PLE-0745  | M   | wild    | KENYA    | PLE-0275  | F   | wild    | TANZANIA     | PLE-0635  | F   | wild    | TANZANIA |
| PLE-0748  | M   | wild    | KENYA    | PLE-0279  | M   | wild    | TANZANIA     | PLE-0636  | F   | wild    | TANZANIA |
| PLE-0750  | F   | wild    | KENYA    | PLE-0283  | F   | wild    | TANZANIA     | PLE-0637  | F   | wild    | TANZANIA |
| PLE-0763  | F   | wild    | KENYA    | PLE-0287  | M   | wild    | TANZANIA     | PLE-0638  | M   | wild    | TANZANIA |
| PLE-0766  | F   | wild    | KENYA    | PLE-0295  | F   | wild    | TANZANIA     | PLE-0648  | M   | wild    | TANZANIA |
| PLE-0005  | F   | captive | MOROCCO  | PLE-0297  | F   | wild    | TANZANIA     | PLE-0913  | F   | wild    | TANZANIA |
| PLE-0006  | F   | captive | MOROCCO  | PLE-0298  | F   | wild    | TANZANIA     | PLE-0914  | F   | wild    | TANZANIA |
| PLE-0007  | F   | captive | MOROCCO  | PLE-0304  | F   | wild    | TANZANIA     | PLE-0915  | M   | wild    | TANZANIA |
| PLE-0666  | M   | captive | MOROCCO  | PLE-0305  | F   | wild    | TANZANIA     | PLE-0916  | F   | wild    | TANZANIA |
| PLE-0401  | F   | wild    | NAMIBIA  | PLE-0311  | F   | wild    | TANZANIA     | PLE-0919  | M   | wild    | TANZANIA |
| PLE-0402  | F   | wild    | NAMIBIA  | PLE-0313  | M   | wild    | TANZANIA     | PLE-0922  | F   | wild    | TANZANIA |
| PLE-0403  | M   | wild    | NAMIBIA  | PLE-0315  | F   | wild    | TANZANIA     | PLE-0923  | F   | wild    | TANZANIA |
| PLE-0404  | F   | wild    | NAMIBIA  | PLE-0317  | M   | wild    | TANZANIA     | PLE-0924  | M   | wild    | TANZANIA |
| PLE-0405  | M   | wild    | NAMIBIA  | PLE-0319  | M   | wild    | TANZANIA     | PLE-0941  | F   | wild    | TANZANIA |
| PLE-0409  | M   | wild    | NAMIBIA  | PLE-0320  | M   | wild    | TANZANIA     | PLE-0942  | M   | wild    | TANZANIA |
| PLE-0410  | M   | wild    | NAMIBIA  | PLE-0326  | M   | wild    | TANZANIA     | PLE-0943  | M   | wild    | TANZANIA |
| PLE-0411  | F   | wild    | NAMIBIA  | PLE-0327  | M   | wild    | TANZANIA     | PLE-1016  | M   | wild    | TANZANIA |
| PLE-0412  | M   | wild    | NAMIBIA  | PLE-0328  | F   | wild    | TANZANIA     | PLE-1017  | F   | wild    | TANZANIA |
| PLE-0413  | F   | wild    | NAMIBIA  | PLE-0330  | F   | wild    | TANZANIA     | PLE-1020  | F   | wild    | TANZANIA |
| PLE-0415  | F   | wild    | NAMIBIA  | PLE-0331  | M   | wild    | TANZANIA     | PLE-0029  | M   | captive | ZIMBABWE |
| PLE-0416  | M   | wild    | NAMIBIA  | PLE-0332  | M   | wild    | TANZANIA     | PLE-0668  | F   | wild    | UGANDA   |
| PLE-0417  | F   | wild    | NAMIBIA  | PLE-0333  | M   | wild    | TANZANIA     | PLE-0669  | M   | wild    | UGANDA   |
| PLE-0418  | F   | wild    | NAMIBIA  | PLE-0334  | M   | wild    | TANZANIA     | PLE-0670  | M   | wild    | UGANDA   |
| PLE-0419  | M   | wild    | NAMIBIA  | PLE-0335  | M   | wild    | TANZANIA     | PLE-0671  | M   | wild    | UGANDA   |
| PLE-0422  | F   | wild    | NAMIBIA  | PLE-0338  | M   | wild    | TANZANIA     | PLE-0672  | F   | wild    | UGANDA   |
| PLE-0425  | M   | wild    | NAMIBIA  | PLE-0345  | M   | wild    | TANZANIA     | PLE-0673  | M   | wild    | UGANDA   |
| PLE-0427  | M   | wild    | NAMIBIA  | PLE-0346  | M   | wild    | TANZANIA     | PLE-0674  | M   | wild    | UGANDA   |
| PLE-0437  | M   | wild    | NAMIBIA  | PLE-0347  | M   | wild    | TANZANIA     | PLE-0675  | F   | wild    | UGANDA   |
| PLE-0439  | M   | wild    | NAMIBIA  | PLE-0349  | M   | wild    | TANZANIA     | PLE-0676  | F   | wild    | UGANDA   |

BOTSWANA (Chobe National Park, Makgadikgadi National Park, Mphatlutwa Pan, Monamodi Pan, Nxai Pan, Okavango, Vumbora, Kwando, Whater Cut); INDIA (Gir Forest); KENYA (Laikipia); NAMIBIA (Charitsaub, Duikerdrink, Eindpaal, Gemsbokvlakte, Gobaub, M'Bari, Okaukuejo, Okondeka, Skeleton Coast, West Etosha National Park); SOUTH AFRICA (South Kalahari, Kruger National Park); TANZANIA (Ngorongoro Crater, Serengeti National Park); UGANDA (Queen Elizabeth National Park).
