# Supplementary material
Source: publisher figshare collection journal article supplement (https://plos.figshare.com/articles/dataset/_/149219)
Supplement: Supplementary file [file 1]

Table S5. Bottleneck analysis in lion populations using the standardized differences test and the stepwise mutation model (SMM).

|         | <u>Standardized differences test</u> |
|---------|--------------------------------------|
|         | <u>SMM</u>                           |
| GIR     | *                                    |
| UGA     | ns                                   |
| KEN     | ns                                   |
| SER-I   | ***                                  |
| SER-II  | **                                   |
| SER-III | ***                                  |
| NGC     | *                                    |
| KRU     | *                                    |
| BOT-I   | *                                    |
| BOT-II  | ns                                   |
| NAM     | ns                                   |

ns - not significant; \* $P < 0.05$ ; \*\* $P < 0.01$ ; \*\*\* $P < 0.001$ .
