# Supplementary material
Source: publisher figshare collection journal article supplement (https://plos.figshare.com/articles/dataset/_/149219)

1-dimensional IBD

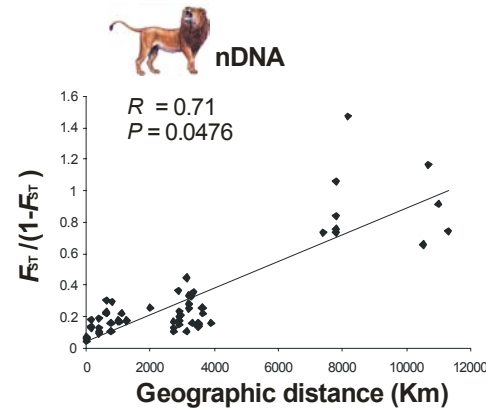

2-dimensional IBD

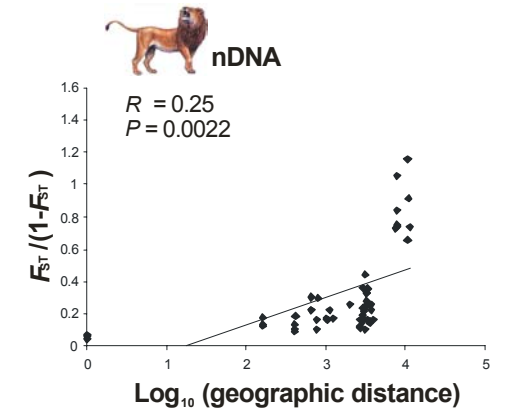

**Figure S2.** Linearized genetic differentiation of host and viral genetic markers with geographic distance. Regression of linearized  $F_{ST}$  estimates [24] for lion (nDNA and mtDNA) and FIV<sub>Plc</sub> (*pol*-RT) genetic data plotted both against the geographic distance (model assuming habitat to be arrayed in an infinite one-dimensional lattice; one-dimension isolation-by-distance [IBD]) and the log geographic distance (model assuming an infinite two-dimensional lattice; two-dimension isolation-by-distance) on geographic distance.

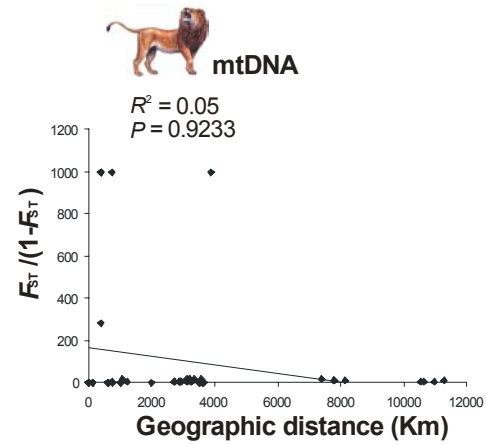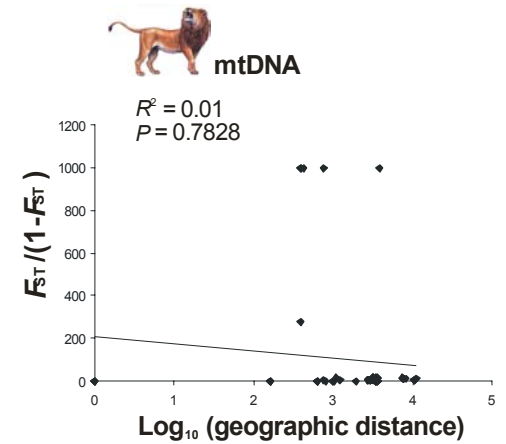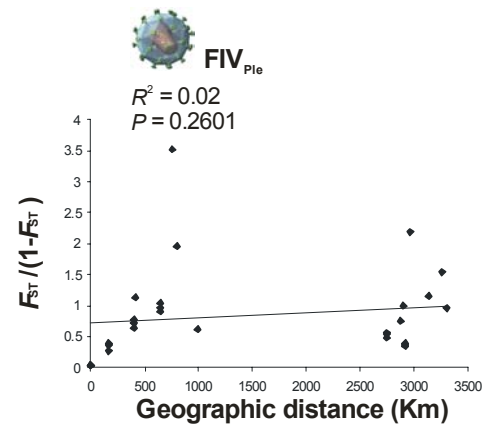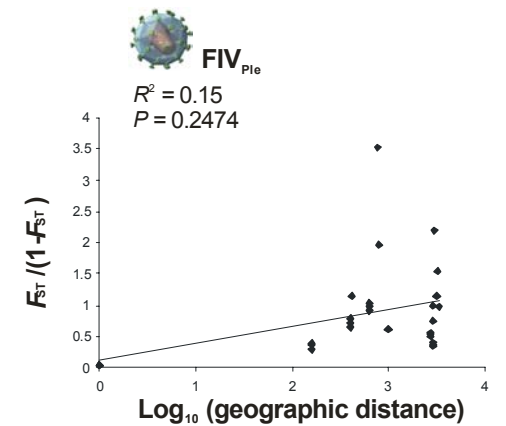

Supplement: Supplementary file [file 1]
