# Supplementary material
Source: publisher figshare collection journal article supplement (https://plos.figshare.com/articles/dataset/_/149219)
Supplement: Supplementary file [file 1]

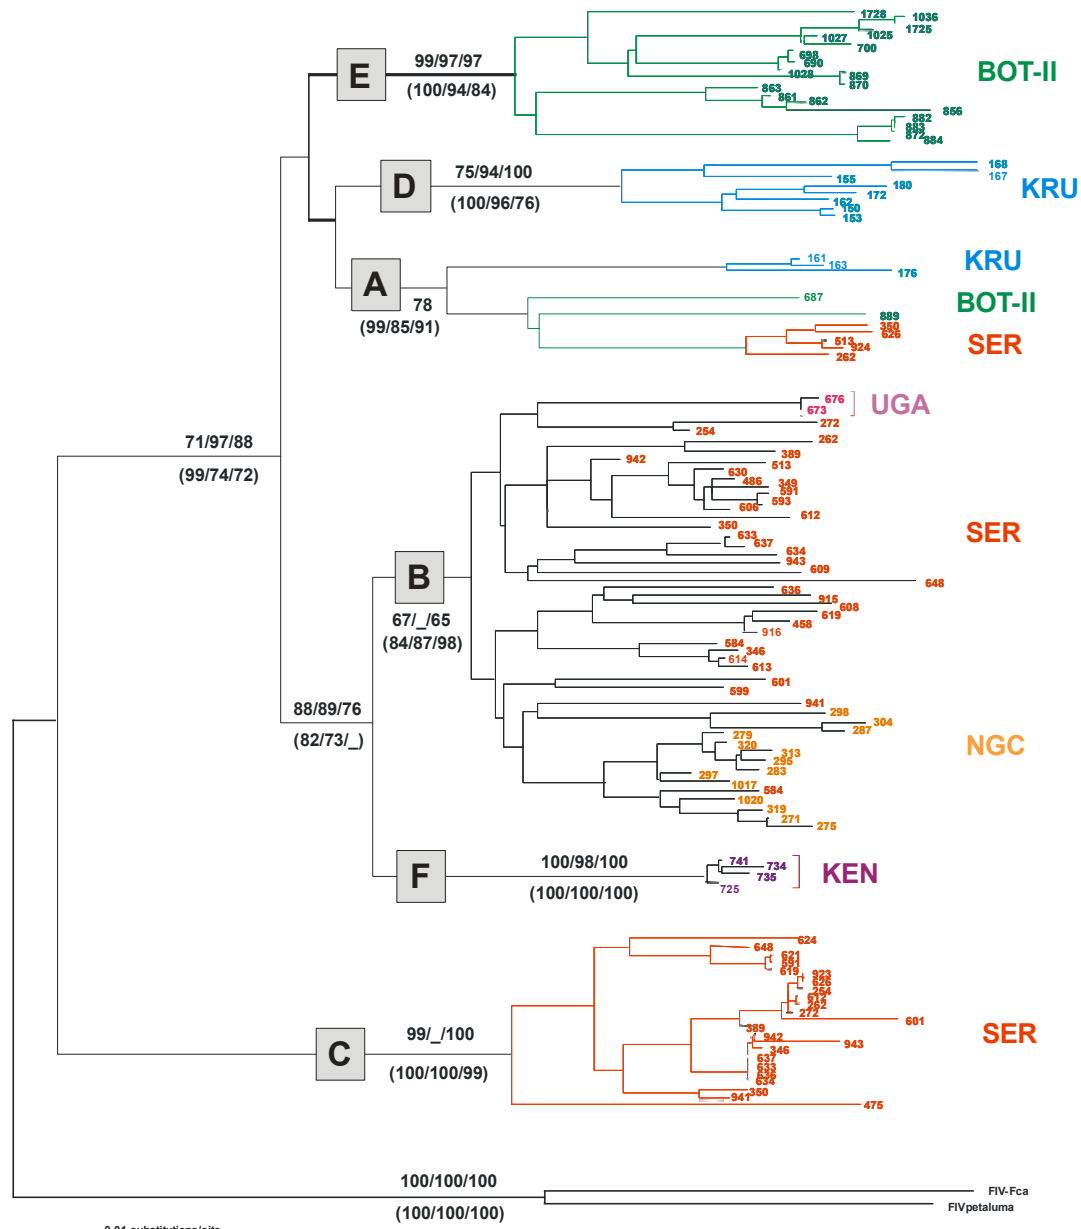

**Figure S4.** Phylogenetic relationships of the FIV<sub>Ple</sub> *pol*-RT sequences. Neighbour-joining tree of the 301 bp FIV<sub>Ple</sub> *pol*-RT sequences. The distinct FIV<sub>Ple</sub> subtypes were labelled A to F. Bootstrap (BPS) values are placed at each branchpoint (ME/MP/ML) and in parenthesis are the BPS values obtained for a tree established with 520 bp of FIV<sub>Ple</sub> *pol*-RT sequence for a representative subset of individuals.
